# Supplementary material
Source: publisher figshare collection journal article supplement (https://karger.figshare.com/ndownloader/files/15562931)
Supplement: Supplementary file 1 [file 15562931]

## SUPPLEMENT

**Supplementary Table 1.** Customized instrument for article quality assessment

|                                                                                                                                   | Yes         | No | Un-clear | Not applicable |
|-----------------------------------------------------------------------------------------------------------------------------------|-------------|----|----------|----------------|
| Was the sample frame representative for the target population?                                                                    |             |    |          |                |
| Was the sampling appropriate to represent the target population?                                                                  |             |    |          |                |
| Was the sample size adequate?                                                                                                     |             |    |          |                |
| Was the likelihood of nonresponse bias minimal? Was low response managed appropriately?                                           |             |    |          |                |
| Was the description of study instruments, setting and subjects sufficient?                                                        |             |    |          |                |
| Was the study instrument used for measurement of the parameter of interest shown to have validity and reliability?                |             |    |          |                |
| Were all subjects examined in the same way?                                                                                       |             |    |          |                |
| Was the data analysis conducted with sufficient coverage of the identified sample                                                 |             |    |          |                |
| Was the statistical analysis appropriate?                                                                                         |             |    |          |                |
| Summary                                                                                                                           | of 9 points |    |          |                |
| 1 point for each “Yes” answer given. High risk of bias: 0-3 points, medium risk of bias: 4-6 points, low risk of bias: 7-9 points |             |    |          |                |
